# Supplementary material
Source: PubMed Central journal article supplement (PMC4378417)
Supplement: pnas.201419906SI.pdf [file pnas.201419906SI.pdf]

# Supporting Information

Cedervall et al. 10.1073/pnas.1419906112

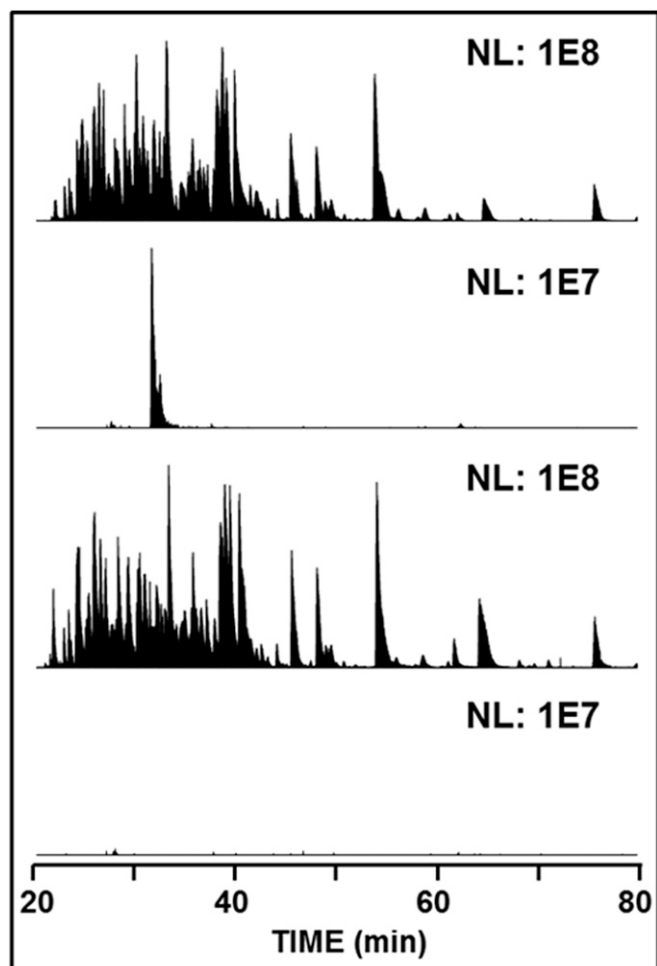

**Fig. S1.** LC-MS peptide mapping. Top, peptic digest of PDE4B<sub>cryst</sub> with no DTT treatment; second, extracted ion plot for  $m/z = 789.615$ , corresponding to  $[M+4H]^{4+}$  of two peptide fragments (264-273 and 600-618) linked by a disulfide bond; third, DTT-treated peptic digest of PDE4B<sub>cryst</sub>; and fourth, extracted ion plot as before for the DTT-treated sample. NL, normalized level. The reduced sample is a control as any peak identified as a disulfide linked fragment (second panel) is expected to be absent under reducing conditions (fourth panel). The identity of the DTT-sensitive fragment was confirmed by tandem-MS (Fig. S3).



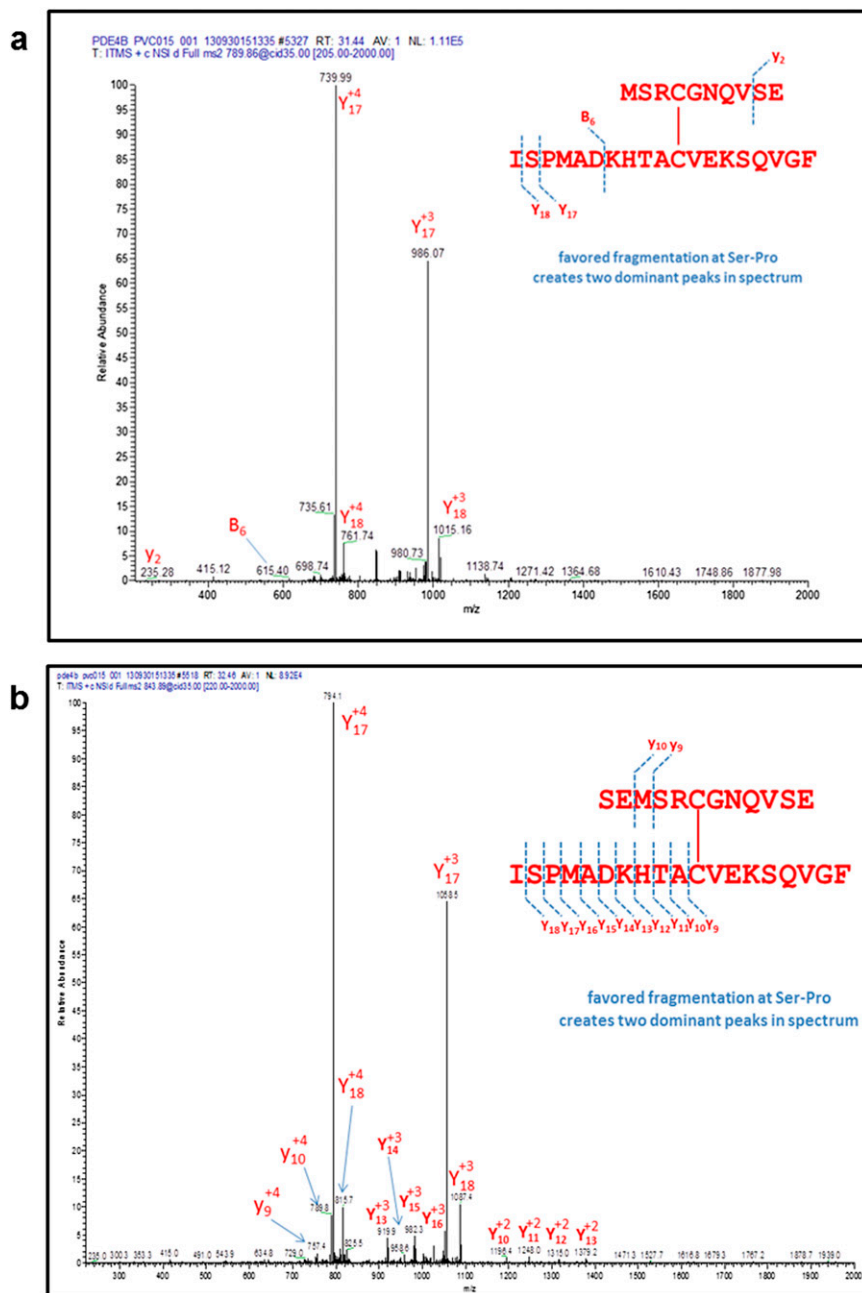

**Fig. S3.** Tandem MS spectrum (collision-induced dissociation) of (A) 4+ charged peak with  $m/z = 789.86$  identified as the disulfide-linked fragment of PDE4B<sub>crist</sub> linking peptides 264–273 and 600–618 (PDE4B1 numbering) and (B) 4+ charged peak with  $m/z = 843.89$  identified as the fragment linking peptides 262–273 and 600–618. Major peaks in the spectrum support the identity assigned.

|     |                                    |        |     |       |                    |                    |        |        |       |
|-----|------------------------------------|--------|-----|-------|--------------------|--------------------|--------|--------|-------|
| 141 | DYDLSPKAMSRNS SLPSEQHGDDLVITPFAQV  | AS     | RS  | VRNN  | ITILTNLHGT-SNKRSPA | 199                | Q07343 | PDE4B  |       |
| 153 | DYDMSPKTMSRNS SVTSEAHAEEDLVITPFAQV | AS     | RS  | VRN   | SLLTNVPVP-SNKRSP   | 211                | P27815 | PDE4A  |       |
| 198 | DYDLSPKMSRNS SIASDIHGDDLVITPFAQV   | AS     | RT  | VRNN  | TAALTNLQDRAPSKRSP  | 257                | Q08499 | PDE4D  |       |
| 127 | DYELSPKAMSRNS SVASDLHGDEMIVT       | FAQV   | AS  | RT    | VRNS               | VAALARQQCLGAAKQGPV | 186    | Q08493 | PDE4C |
| 200 | ASQPPVSRVNPQEEYQKLAMETLEE          | DWCLDQ | LET | IQTYR | SVSEMASNKF         | KRMLNRELT          | 259    | Q07343 | PDE4B |
| 212 | GGPTPVCKATLSEETCQLARETLEE          | DWCLDQ | LET | MQTYR | SVSEMASHK          | KRMLNRELT          | 271    | P27815 | PDE4A |
| 258 | CNQPSINKATITEEAYQKLASETLEE         | DWCLDQ | LET | LQTRH | SVSEMASNKF         | KRMLNRELT          | 317    | Q08499 | PDE4D |
| 187 | GNPSSNQLPFAEDTGQKLALETLEE          | DWCLDQ | LET | LQTRH | SVGEMASNKF         | KRILNRELT          | 246    | Q08493 | PDE4C |

**Fig. S4.** Sequence alignment of the dimerization domains in human PDE4A to -D. The conserved polar residues that make intrachain salt bridges in the crystal structure are highlighted in yellow, and the conserved hydrophobic residues that constitute the core of the 4-helix bundle that forms the primary dimer interface in PDE4B<sub>crist</sub> are highlighted in red (UCR1) and green (UCR2). Sequence alignment was done in Uniprot.

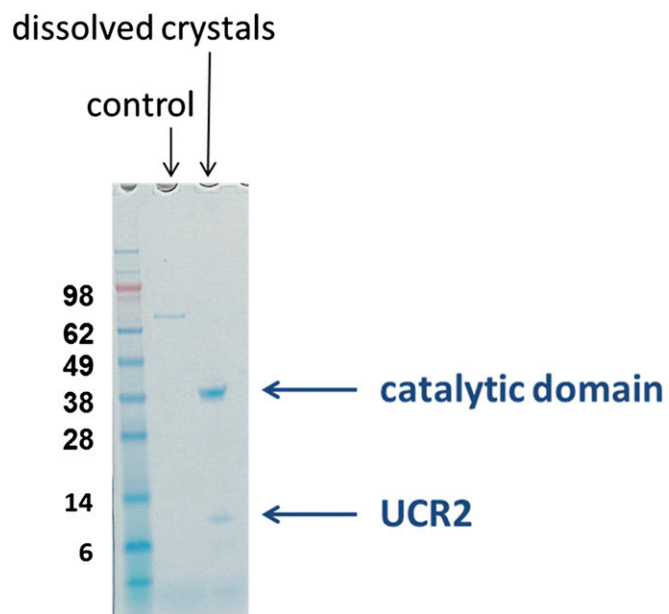

**Fig. S5.** Reducing SDS/PAGE analysis of dissolved PDE4B<sub>cryst</sub> crystals showed that proteolytic cleavage had occurred during crystallization. N-terminal sequencing and LC-MS analysis of the excised gel bands showed them to be catalytic domain (*Upper*) and UCR2 (*Lower*).

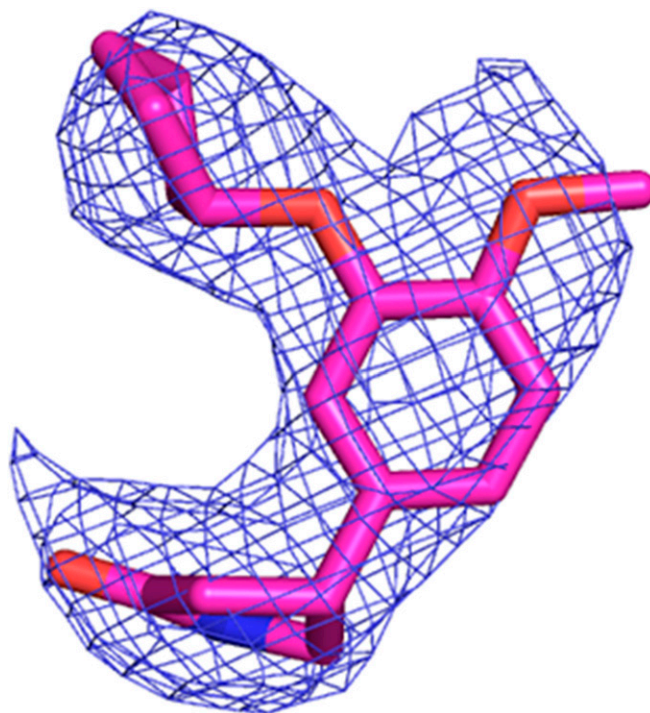

**Fig. S6.** Rolipram binding mode is well-defined in electron density maps. A ( $2Fo-Fc$ ) map contoured at  $1.4\sigma$  around rolipram in the PDE4B<sub>cryst</sub>-rolipram complex crystal structure (resolution 3.2 Å).



**Table S3. List of mutations in *PDE4D* found in acrodysostosis patients, equivalent residues in *PDE4B1* and numbering in Fig. 8**

| Number in Fig. 8 | PDE4D*    | PDE4B  |
|------------------|-----------|--------|
| 1                | Pro225Thr | Pro168 |
| 1                | Pro225Leu | Pro168 |
| 2                | Phe226Val | Phe169 |
| 2                | Phe226Cys | Phe169 |
| 2                | Phe226Ser | Phe169 |
| 3                | Ala227Ser | Ala170 |
| 4                | Gln228Glu | Gln171 |
| 5                | Ser301Thr | Ser243 |
| 6                | Met303Val | Met245 |
| 7                | Ala304Val | Ala246 |
| 8                | Val329Ala | Val271 |
| 9                | Thr587Pro | Thr531 |
| 10               | Glu590Ala | Glu534 |
| 11               | Gly673Asp | Gly617 |
| 12               | Ile678Thr | Ile622 |

\*Data from ref. 1.

1. Lindstrand A, et al. (2014) Different mutations in *PDE4D* associated with developmental disorders with mirror phenotypes. *J Med Genet* 51(1):45–54.
